# Supplementary material
Source: PubMed Central journal article supplement (PMC11029515)
Supplement: 262_2016_1910_MOESM1_ESM.pdf [file 262_2016_1910_MOESM1_ESM.pdf]

**Supplementary Table 1** Number of IL-2 doses

| mM      |     |      |        |         |         | mRCC    |     |      |        |         |         |
|---------|-----|------|--------|---------|---------|---------|-----|------|--------|---------|---------|
| Cycle # | N   | Mean | Median | Minimum | Maximum | Cycle # | N   | Mean | Median | Minimum | Maximum |
| 1       | 170 | 9.37 | 9      | 3       | 14      | 1       | 191 | 8.78 | 9      | 1       | 15      |
| 2       | 157 | 7.83 | 8      | 1       | 13      | 2       | 174 | 6.64 | 6      | 1       | 14      |
| 3       | 60  | 8.7  | 9      | 2       | 14      | 3       | 52  | 8.35 | 8      | 2       | 14      |
| 4       | 56  | 7    | 7      | 1       | 14      | 4       | 48  | 5.96 | 6      | 1       | 11      |
| 5       | 24  | 8.92 | 9      | 4       | 14      | 5       | 15  | 7.73 | 7      | 5       | 14      |
| 6       | 24  | 5.75 | 5.5    | 1       | 14      | 6       | 13  | 5.23 | 5      | 3       | 8       |
| 7       | 5   | 7.6  | 8      | 4       | 9       | 7       | 5   | 5.6  | 5      | 4       | 7       |
| 8       | 3   | 8    | 8      | 7       | 9       | 8       | 5   | 5.2  | 5      | 4       | 7       |
| 9       | 2   | 9    | 9      | 8       | 10      | 9       | 1   | 5    | 5      | 5       | 5       |
| 10      | 2   | 8.5  | 8.5    | 7       | 10      |         |     |      |        |         |         |
| 11      | 1   | 10   | 10     | 10      | 10      |         |     |      |        |         |         |
| 12      | 1   | 9    | 9      | 9       | 9       |         |     |      |        |         |         |

**Supplementary Table 2** Therapies prior to IL-2

| Prior Therapy                                         | mM<br>(N) | mRCC<br>(N) |
|-------------------------------------------------------|-----------|-------------|
| Only Chemotherapy                                     | 19        | 3           |
| Only Immunotherapy                                    | 44        | 1           |
| Only Targeted Therapy                                 | 0         | 21          |
| Chemotherapy &<br>Immunotherapy                       | 11        | 1           |
| Chemotherapy & Targeted<br>Therapy                    | 0         | 1           |
| Immunotherapy & Targeted<br>Therapy                   | 1         | 3           |
| Chemotherapy &<br>Immunotherapy & Targeted<br>Therapy | 2         | 0           |
| Total                                                 | 77        | 30          |

**Supplementary Table 3** Response to IL-2 by prior therapy for mM

| # of Prior Therapy | CR<br>(N) | PR<br>(N) | SD<br>(N) | PD<br>(N) | Missing<br>(N) | Total<br>(N) |
|--------------------|-----------|-----------|-----------|-----------|----------------|--------------|
| 1                  | 3         | 3         | 10        | 38        | 1              | 55           |
| 2                  | 0         | 2         | 6         | 9         | 1              | 18           |
| 3 or more          | 0         | 0         | 1         | 3         | 0              | 4            |

Prior systemic treatments include chemotherapy, immunotherapy (including IFN-a), targeted therapy. It does not include radiation, surgery, and other treatments.

**Supplementary Table 4** Response to IL-2 by prior therapy for mRCC

| # of Prior Therapy | CR<br>(N) | PR<br>(N) | SD<br>(N) | PD<br>(N) | Missing<br>(N) | Total<br>(N) |
|--------------------|-----------|-----------|-----------|-----------|----------------|--------------|
| 1                  | 1         | 1         | 3         | 13        | 1              | 19           |
| 2                  | 0         | 0         | 2         | 5         | 2              | 9            |
| 3 or more          | 0         | 0         | 0         | 2         | 0              | 2            |

Prior systemic treatments include chemotherapy, immunotherapy (including IFN-a), targeted therapy. It does not include radiation, surgery, and other treatments.

# Supplementary Figure 1

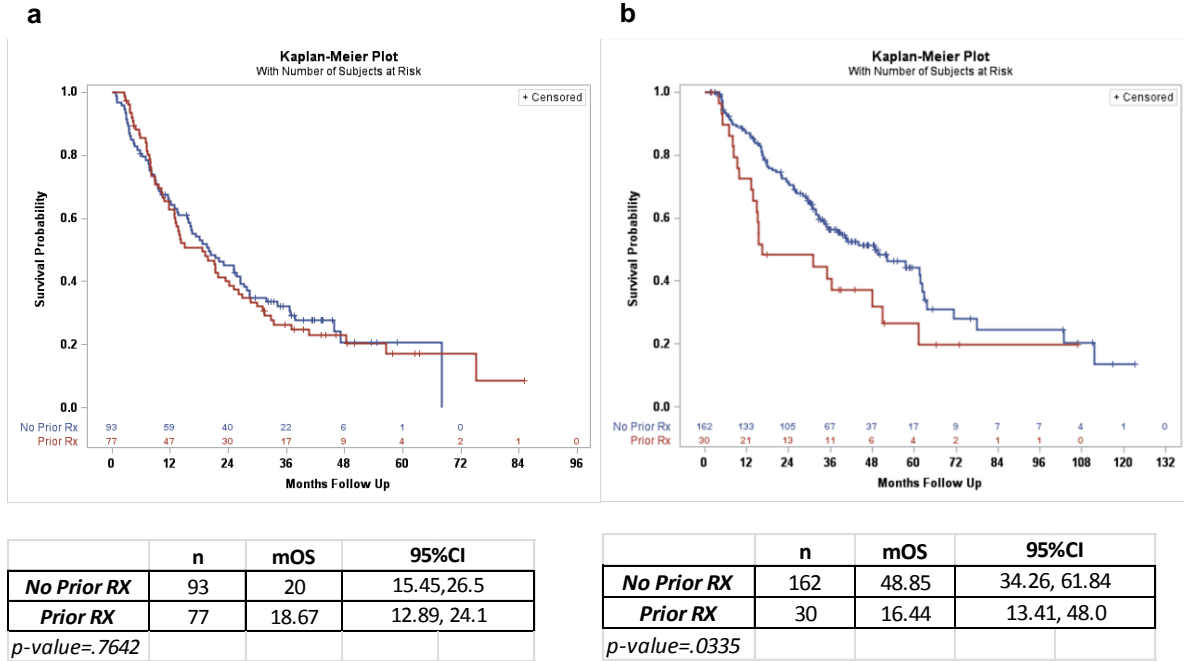

**Supplementary Figure 1 a** Overall survival in mM patients with and without prior systemic therapy. **b** Overall survival in mRCC patients with and without prior systemic therapy. Prior systemic therapy included chemotherapy, targeted therapy, and/or immunotherapy.
